# Supplementary material for: Can Improved Farm Biosecurity Reduce the Need for Antimicrobials in Food Animals? A Scoping Review
Source: MDPI journal article supplement (doi:10.3390/antibiotics12050893), 2023-05-11
Supplement: s1 [file s1]

**Supplementary Table S2: Search approaches for scoping review for the research question “Is There an Association Between Antimicrobial Usage and Farm Biosecurity in Food Animals?”: search strategy applied in PubMed**

|                         |                                                                                                                                                                                                                                                                      |
|-------------------------|----------------------------------------------------------------------------------------------------------------------------------------------------------------------------------------------------------------------------------------------------------------------|
| <i>Population</i>       |                                                                                                                                                                                                                                                                      |
| 1                       | "Livestock"                                                                                                                                                                                                                                                          |
| 2                       | "poultry"                                                                                                                                                                                                                                                            |
| 3                       | "cattle"                                                                                                                                                                                                                                                             |
| 4                       | "dairy animals"                                                                                                                                                                                                                                                      |
| 5                       | "dairy cattle"                                                                                                                                                                                                                                                       |
| 6                       | "beef production"                                                                                                                                                                                                                                                    |
| 7                       | "beef cattle"                                                                                                                                                                                                                                                        |
| 8                       | "buffaloes"                                                                                                                                                                                                                                                          |
| 9                       | "pig"                                                                                                                                                                                                                                                                |
| 10                      | "swine"                                                                                                                                                                                                                                                              |
| 11                      | "goat"                                                                                                                                                                                                                                                               |
| 12                      | "sheep"                                                                                                                                                                                                                                                              |
| 13                      | "chicken"                                                                                                                                                                                                                                                            |
| 14                      | "broiler"                                                                                                                                                                                                                                                            |
| 15                      | "layer"                                                                                                                                                                                                                                                              |
| 16                      | "turkey"                                                                                                                                                                                                                                                             |
| 17                      | "duck"                                                                                                                                                                                                                                                               |
| 18                      | ("Livestock" OR "poultry" OR "farm" OR "animal production" OR "cattle" OR "dairy animals" OR "dairy cattle" OR "beef production" OR "beef cattle" OR "buffalo*" OR "pig" OR "swine" OR "goat" OR "sheep" OR "chicken" OR "broiler" OR "layer" OR "turkey" OR "duck") |
| 19                      | OR/1-17                                                                                                                                                                                                                                                              |
| <i>Area of Interest</i> |                                                                                                                                                                                                                                                                      |
| 20                      | "antimicrobial resistance"                                                                                                                                                                                                                                           |
| 21                      | "antibiotic resistance"                                                                                                                                                                                                                                              |
| 22                      | "antimicrobial usage"                                                                                                                                                                                                                                                |
| 23                      | "antibiotic usage"                                                                                                                                                                                                                                                   |
| 24                      | ("antimicrobial resistance" OR "antibiotic resistance" OR "antimicrobial usage" OR "antibiotic usage")                                                                                                                                                               |
| 25                      | OR/20-23                                                                                                                                                                                                                                                             |
| <i>Context</i>          |                                                                                                                                                                                                                                                                      |
| 26                      | "biosecurity"                                                                                                                                                                                                                                                        |
| 27                      | "farm biosecurity"                                                                                                                                                                                                                                                   |
| 28                      | "animal biosecurity"                                                                                                                                                                                                                                                 |
| 29                      | "preventive veterinary medicine"                                                                                                                                                                                                                                     |
| 30                      | "herd health management"                                                                                                                                                                                                                                             |
| 31                      | ("biosecurity" OR "farm biosecurity" OR "animal biosecurity" OR "preventive veterinary medicine" OR "herd health management")                                                                                                                                        |
| 32                      | OR/26-30                                                                                                                                                                                                                                                             |
| <i>Outcomes</i>         |                                                                                                                                                                                                                                                                      |

|    |                                                                                                                                                                                                                                                                                                                                                                                                                                                                                                                   |
|----|-------------------------------------------------------------------------------------------------------------------------------------------------------------------------------------------------------------------------------------------------------------------------------------------------------------------------------------------------------------------------------------------------------------------------------------------------------------------------------------------------------------------|
| 33 | ("biosecurity" OR farm biosecurity" OR "animal biosecurity" OR "preventive veterinary medicine" OR "herd health management")                                                                                                                                                                                                                                                                                                                                                                                      |
| 34 | ("antimicrobial resistance" OR "antibiotic resistance" OR "antimicrobial usage" OR "antibiotic usage")                                                                                                                                                                                                                                                                                                                                                                                                            |
| 35 | ("Livestock" OR "poultry" OR "farm" OR "animal production" OR "cattle" OR "dairy animals" OR "dairy cattle" OR "beef production" OR "beef cattle" OR "buffalo*" OR "pig" OR "swine" OR "goat" OR "sheep" OR "chicken" OR "broiler" OR "layer" OR "turkey" OR "duck")                                                                                                                                                                                                                                              |
| 36 | ("Biosecurity" OR "farm biosecurity" OR "animal biosecurity" OR "preventive veterinary medicine" OR "herd health management") AND ("antimicrobial resistance" OR "antibiotic resistance" OR "antimicrobial usage" OR "antibiotic usage") AND ("Livestock" OR "poultry" OR "farm" OR "animal production" OR "cattle" OR "dairy animals" OR "dairy cattle" OR "beef production" OR "beef cattle" OR "buffalo*" OR "pig" OR "swine" OR "goat" OR "sheep" OR "chicken" OR "broiler" OR "layer" OR "turkey" OR "duck") |
| 37 | AND/18, 24, 31                                                                                                                                                                                                                                                                                                                                                                                                                                                                                                    |
